# Supplementary material for: Chemical Characteristics of Three Kinds of Japanese Soy Sauce Based on Electronic Senses and GC-MS Analyses
Source: Front Microbiol. 2021 Jan 6;11:579808. doi: 10.3389/fmicb.2020.579808 (PMC7815529; doi:10.3389/fmicb.2020.579808)
Supplement: Supplementary file 1 [file Table_1.XLSX]

## Sheet: Sheet1
Table S1 Volatile flavors detected in soy sauce
CAS	Compounds	Concentration (mg/L)			Odor threshold	OAV
		S1	S2	S3		S1	S2	S3
Alcohols
64-17-5	Ethanol	20.467	3.85927	31.8193	950	0.02	0.00406239	0.033494
110225-00-8	1-Dodecanol, 2-hexyl-	0.00862353
112-53-8	1-Dodecanol	0.0365458	0.141432	0.202257	0.016	2.28411	8.83952	12.6411
118-71-8	Maltol	0.0437441			1.24	0.0352775
123-51-3	isoamylol	1.40444	0.432792	0.745367	0.004	351.109	108.198	186.342
137-32-6	2-methylbutan-1-ol	0.642719		0.4094	0.0159	40.4226		25.7484
1454-85-9	1-Heptadecanol			0.0199681
15594-90-8	1-Heneicosanol	0.0205222	0.0241225
1569-01-3	1-Propoxy-2-Propanol	0.0435262
2035-94-1	2-phenyl-butanol		0.042003
22427-95-8	4,7-Dimethyl-3,7-decadiene-5,6-diol;	0.0786835
24347-58-8	(R,R)-butane-2,3-diol	3.90241	0.204862	0.778076	0.0951	41.0348	2.15417	8.18166
3347-57-7	1-phenyl-2-buten-1-ol	0.108615
4254-14-2	(R)-propane-1,2-diol	0.00571648
505-10-2	1-Propanol, 3-(methylthio)-	0.223364			0.12323	1.81258
513-85-9	2,3-Butanediol	1.45695			>100	>0.015
53951-44-3	1,3-Dioxolane-4-methanol, 2-ethyl-	0.0371903	0.0507651
60-12-8	Phenylethyl Alcohol	2.0714	2.19449	1.65762	0.56423	3.6712	3.88935	2.93784
71-36-3	1-Butanol			0.193796	0.4592			0.42203
78-83-1	isobutanol	1.05498	0.189521	0.872459	6.5052	0.162175	0.0291337	0.134117
91337-07-4	2-Isopropyl-5-methyl-1-heptanol	0.00454314
98-00-0	2-Furanmethanol	0.116982			4.5005	0.025993
2004-39-9	1-Heptacosanol		0.0352381
45235-48-1	2-octyldecan-1-ol		0.015816
69393-24-4	2-cyclopentyl-1-(1H-imidazol-2-yl)ethanone		0.0263933
19132-06-0	(S,S)-butane-2,3-diol			0.342049
67-63-0	propan-2-ol			0.502561	9.7879			0.0513451
4254-15-3	(S)-(+)-1,2-Propanediol			12.0763
71-41-0	1-Pentano1		0.193232	0.154734	0.1502		1.2865	1.03018
583-03-9	Fenipentol		0.630472	0.3726
18607-90-4	Kakoul		0.0353498	0.0168477
4028-59-5	(1R,2S,3R)-1,2-dimethyl-3-(prop-1-en-2-yl)cyclopentanol			0.0183254
24034-73-9	trans-Geranylgeraniol		0.028622	0.0689281
629-76-5	n-Pentadecanol		0.0140454	0.0431504
5353-25-3	2-oleyloxy-1-ethanol			0.0377291
Esters
101-97-3	Benzeneacetic acid, ethyl ester	0.0632114	0.0564696	0.0868502	0.15555	0.406373	0.363032	0.558343
103-45-7	Acetic acid, 2-phenylethyl ester	0.018096			0.24959	0.0725029
104-61-0	gamma-Nonanolactone	0.030403	0.033777		0.0097	3.13433	3.48216
10522-34-6	nonyl 2-methylpropanoate		0.0704663	0.0463141
105-54-4	Ethyl butyrate	0.00380344			0.0009	4.22604		0
108-64-5	ethyl isovalerate	0.00721855			1e-05	721.855
110-19-0	Isobutyl acetate	0.00560268			0.025	0.224107
111-61-5	ethyl stearate	0.0172961	0.265573	2.23969	>0.5	0.0345923	0.531146	4.47938
112-39-0	Hexadecanoic acid, methyl ester	0.0186577			＞2
112-61-8	Methyl stearate		0.00301912	0.0093643
117-81-7	Bis(2-ethylhexyl) phthalate		0.0336495	0.0273182
123-25-1	Butanedioic acid, diethyl ester	0.124142		0.0346417	0.79
131-20-4	Diisooctyl phthalate	0.0386511
141-78-6	Ethyl Acetate	1.36765	0.356184	2.51246	0.005	273.529	71.2368	502.492
142-91-6	Isopropyl palmitate		0.0204884
17431-03-7	L-Valine, ethyl ester	0.0349361
2743-60-4	L-Leucine, ethyl ester	0.0812062
3879-26-3	Nerylacetone		0.0667527	0.128261
544-35-4	Linoleic acid ethyl ester	0.239044	2.02747	11.6476	0.45	0.531209	4.5055	25.8836
54546-22-4	ethyl hexadec-9-enoate			0.10515
5466-77-3	Octyl 4-methoxycinnamate	0.0131842
55682-91-2	Methyl heptacosanoate	0.00594435		0.0799092
59130-69-7	Hexadecyl 2-ethylhexanoate	0.131088
6114-18-7	ethyl elaidate			10.6321
614-18-6	Ethyl nicotinate	0.0608321
617-05-0	Ethyl 4-hydroxy-3-methoxybenzoate	0.0750359			0.99	0.0757938
6259-76-3	n-Hexyl salicylate	0.0535744
628-97-7	Hexadecanoic acid, ethyl ester	0.245002	1.19267	6.84978	2	0.122501	0.596336	3.42489
68039-26-9	Amyl-2-Methylbutyrate		0.0426575		0.0086-0.043		0.992-4.9602
687-47-8	Ethyl L(-)-lactate		0.0978937		0.5-10		0.0098-0.1958
6946-90-3	Ethyl dl-2-hydroxycaproate	0.0082557
77-93-0	Triethyl citrate	0.0781431
84-66-2	Diethyl Phthalate			0.476141
84-69-5	Diisobutyl phthalate	0.016108	0.0715124	0.0744516
84-74-2	Dibutyl phthalate	0.0342471	0.26301	0.722664
93-89-0	Benzoic acid, ethyl ester	0.0418273			0.05556	0.752831
103-23-1	Bis(2-ethylhexyl) adipate		0.352083
106-32-1	Octanoic acid, ethyl ester		0.0307165		0.0193		1.59153
15706-73-7	Butyl 2-methylbutanoate		0.0148018		0.017		0.870694
17931-64-5	3-Cyclopentylpropionic acid, ethyl ester		0.0123062
4702-32-3	dl-Isocitric acid lactone		0.242183
537-39-3	Ethyl Oleate		1.49082
625-22-9	Sulphuric acid dibutyl ester		0.22889
76-49-3	Bornyl acetate		0.145467		1.38		0.105411
97-64-3	Propanoic acid, 2-hydroxy-, ethyl ester			0.34173	50			0.0068
20633-16-3	2-(2-hydroxyethoxy)ethyl nitrate			0.0572298
65596-31-8	methyl 3-hydroxy-4-methylpentanoate		0.0250446	0.112875
74367-34-3	Propane acid 2-methyl-3-hydroxy-2,4,4-trimethylpentyl ester			0.0169571
41114-00-5	Pentadecanoic acid, ethyl ester		0.0324753	0.0240043
110-27-0	Isopropyl myristate		0.0420982	0.0442287
2432-89-5	Decanedioic acid, didecyl ester			0.565893
28474-90-0	l-(+)-Ascorbic acid 2,6-dihexadecanoate			0.0877499
14010-23-2	Ethyl heptadecanoate			0.104267
2777-58-4	Methyl Petroselaidate			0.0335673
1191-41-9	Ethyl linolenate		0.0102971	0.075627
111-62-6	Ethyl Oleate		0.185414	1.31774	0.87		0.21312	1.51464
1731-94-8	Methyl nonadecanoate		0.247413	0.48109
17364-34-0	Methyl docosa-6,9,12,15-tetraenoate			0.026467
137-89-3	Bis(2-ethylhexyl) benzene-1,3-dicarboxylate			0.905
18281-05-5	ethyl arachidate			0.0678394
Aldehydes
100-52-7	Benzaldehyde	0.148466			0.75089	0.19772
10551-58-3	5-Acetoxymethyl-2-furaldehyde	0.0147755
105-57-7	Acetal	0.0396937		0.112183	0.0049	8.10075		22.8945
112-31-2	Decanal	0.0100749	0.0384733	0.0397543	0.003	3.3583	12.8244	13.2514
122-40-7	alpha-Amylcinnamaldehyde	0.162046
122-78-1	Benzeneacetaldehyde	1.34578	1.23951	1.06288	0.0063	213.616	196.747	168.711
1741-41-9	1,1-Diethoxy-2-methylpropane	0.047787
21834-92-4	5-Methyl-2-phenyl-2-hexenal		0.172336	0.176165
26643-91-4	4-Methyl-2-phenyl-2-pentenal	0.029938	0.0775569	0.0760536
3268-49-3	Methional	0.113366			0.00045	251.924
4411-89-6	2-Phenyl-2-butenal	0.171866	0.270754	0.202899
4951-40-0	3-(2,6,6-trimethyl-1-cyclohexen-1-yl)acrylaldehyde	0.00970815	0.0564633	0.0922087
56219-04-6	cis-9-Hexadecenal	0.00815134
590-86-3	Isovaleraldehyde	1.4385	0.90136	1.64101	0.0011	1307.73	819.418	1491.83
65128-96-3	Z-7-Tetradecenal	0.0850251
66-25-1	Hexanal	0.00566848			0.005	1.1337
78-84-2	Isobutyraldehyde	0.894528		0.620348	0.0015	596.352		413.565
832-62-2	4,6,8-Trimethyl-1-azulenecarbaldehyde	0.0473146	0.0162117	0.118873
86-81-7	3,4,5-Trimethoxybenzaldehyde	0.0536664
96-17-3	2-Methylbutyraldehyde	1.56532	0.552938	1.92252	0.001	1565.32	552.938	1922.52
98-01-1	Furfural	0.411536	0.448426		9.562	0.0430387	0.0468967
124-19-6	Nonanal		0.0248741		0.0011		22.6128
14371-10-9	trans-Cinnamaldehyde		0.496004		6		0.0826674
3658-95-5	1,1-Diethoxybutane		0.019989	0.0754465
54889-48-4	Octane, 1,1-diethoxy-			0.0490273
56554-35-9	(9Z)-octadeca-9,17-dienal			0.0284968
Acids
502-50-1	4-Ketopimelic		0.0127871
60-33-3	Linoleic acid			0.0231253
116-53-0	2-methylbutyric acid	0.14	0.24	0.15	2.2	0.0636364	0.109091	0.0681818
503-74-2	3-methylbutanoic acid	0.41	0.66	0.32	0.49	0.836735	1.34694	0.653061
629-83-4	Methyl ester,Triacontanoic acid	0.0100153
64-19-7	Acetic acid	5.55414		1.00703	99	0.0561024		0.010172
79-33-4	L-Lactic acid		0.0916481	0.38882
595-37-9	2,2-dimethylbutanoic	0.107194
595-98-2	2-hydroxy-2-methylpropanedioic acid			0.0631644
61040-81-1	3,5-Dimethoxy-4-methylbenzoic acid			0.218521
Ketones
27538-09-6	HEMF	0.107558	0.0763221	0.0741519	0.00115	93.529	66.367	64.48
10139-84-1	2,4-Dihydroxy-3-methylacetophenone	0.0472862
116-09-6	Hydroxyacetone	0.109943			10
130930-47-1	2-t-Butyl-5-methyl[1,3]dioxolan-4-one	0.0230517
19549-83-8	2,6-Dimethyl-3-heptanone	0.012739
22884-76-0	3-Isobutyl-2,4(3H,5H)-furandione	0.0254852
3720-22-7	Tetrahydro-3,6-dimethyl-2H-pyran-2-one	0.0247768
38818-55-2	Megastigmatrienone	0.0545949	0.111013	0.167067
39151-19-4	3',5'-Dimethoxyacetophenone	0.169117	0.213302
4485-09-0	4-Nonanone		0.3137		0.0082		38.26
689-67-8	6,10-Dimethyl-5,9-undecadien-2-one	0.0107173
77877-19-1	(S)-4-Isopropyl-3-propionyl-2-oxazolidinone	0.352879
82304-66-3	7,9-Di-tert-butyl-1-oxaspiro(4,5)deca-6,9-diene-2,8-dione	0.00939857		0.02368
89053-56-5	(2S,5S)-2-tert-butyl-5-propan-2-yl-1,3-dioxolan-4-one		0.0277426
947-19-3	1-Hydroxycyclohexyl Phenyl Ketone	0.0114378
1201-38-3	2',5'-Dimethoxyacetophenone		0.0977351
541-85-5	5-Methyl-3-heptanone		0.0505144		0.041		1.23
590-90-9	4-Hydroxy-2-butanone		0.427709
815-24-7	Hexamethylacetone		0.0879395
3214-41-3	2,5-Octanedione			0.181673
29183-78-6	2',6'-Dihydroxy-3'-methylacetophenone		0.247639	0.186803
67688-28-2	4-phenylcycloheptanone		0.0563663	0.0744212
Phenols
1138-52-9	3,5-Di-tert-butylphenol	0.107991
135-19-3	2-Naphthalenol		0.137766		3		0.0459221
2785-89-9	4-Ethylguaiacol	1.93539	1.15718	0.694601	0.0695	27.82	16.65	9.99426
7786-61-0	2-Methoxy-4-vinylphenol	6.57876	4.5634	1.44358	0.01202	547.318	379.651	120.098
90-05-1	Guaiacol	0.072624	0.0556127		0.00048	151.3	115.86	0
90-15-3	1-Naphthalenol	0.309139		0.137433	4	0.0772848		0.0343582
91-10-1	2,6-dimethoxyphenol	0.103176			1.85	0.0557708
128-37-0	Butylated Hydroxytoluene		0.185287	0.209017	1		0.185287	0.209017
Ethers
103-73-1	Phenetole	0.0771197
115-10-6	Dimethyl ether		0.278504	0.284498
4536-30-5	ethylene glycol monododecyl ether			0.0956061
629-82-3	1-octoxyoctane	0.0129064		0.055714
Heterocycles
1703-52-2	2-ethyl-5-methylfuran	0.0180955
108-50-9	2,6-Dimethylpyrazine	0.0238705			0.718	0.0332458
13925-03-6	2-Ethyl-6-methylpyrazine	0.0112596			0.04	0.281489
14667-55-1	2,3,5-Trimethylpyrazine	0.0132131			0.35012	0.0377387
6314-97-2	Benzeneacetaldehyde, diethyl acetal	0.0493365		0.0819629
1072-83-9	2-Acetylpyrrole	0.395743			58.58525	0.00675499
89214-89-1	2,2-Dipropyl-N-ethylpiperidine	0.0122328
16528-77-1	4-Octadecylmorpholine		0.0695859
