# Supplementary material for: Chemical Characteristics of Three Kinds of Japanese Soy Sauce Based on Electronic Senses and GC-MS Analyses
Source: Front Microbiol. 2021 Jan 6;11:579808. doi: 10.3389/fmicb.2020.579808 (PMC7815529; doi:10.3389/fmicb.2020.579808)
Supplement: Supplementary file 2 [file Table_2.XLSX]

## Sheet: Sheet1
Table S2 Non-volatile metabolites detected in soy sauce
				Concentration (mg/L) and Relative peak area (%)
Number	CAS	Molecular formula	Compounds	Koikuchi (S1)		Usukuchi (S2)		Amakuchi (S3)
Amino acids
1	56-40-6	C2H5NO2	Glycine	140.092	0.00192353	77.6684	0.000484254	151.635	0.00132949
2	98-79-3	C5H7NO3	L-pyroglutamicacid	2383.25	0.0327232	578.695	0.0036081	1543.06	0.013529
3	673-06-3	C9H11NO2	L-phenylalanine	131.699	0.0018083	11.803	7.35902e-05
4	72-19-5	C4H9NO3	L-threonine	842.033	0.0115615	1120.48	0.00698605	679.337	0.00595621
5	72-18-4	C5H11NO2	L-valine	361.691	0.00496621	73.4066	0.000457683	71.2596	0.000624782
6	56-41-7	C3H7NO2	L-alanine	95.8504	0.00131607			52.3101	0.000458638
7	61-90-5	C6H13NO2	L-leucine					10.1642	8.91167e-05
8	302-84-1	C3H7NO3	serine			23.148	0.000144325
9	56-87-1	C6H14N2O2	L-lysine			56.3644	0.000351426
10	20-79-1	C4H9NO2	4-aminobutyric acid	8.17981	0.000112313	57.0804	0.00035589
Amines
11	108-01-0	C4H11NO	N,N-dimethylethanolamine	186.178	0.00255631	160.403	0.0010001
12	3615-17-6	C8H15NO6	aldehydo-N-acetyl-D-mannosamine	215.557	0.00295971
13	2490-97-3	C7H12N2O4	Aceglutamide					87.9542	0.000771155
14	66343-64-4	C6H6N2S	Monophenyl-sulfdiimid			24.786	0.000154538
15	1356995-90-8	C18H28N2O10	2-amino-N-(2,3,4,6-tetra-O-acetyl-β-D-glucopyranosyl)-butyramide					47.9868	0.000420733
16	139-87-7	C6H15NO2	N-ethyldiethanolamine					74.3285	0.000651689
17	7284-37-9	C6H13NO5	1-glucosamine					230.201	0.00201833
18	141-43-5	C2H7NO	ethanolamine					35.9027	0.000314784
Organic acids
19	97-67-6	C4H6O5	L(-)-Malic acid	33.0759	0.000454149			48.6666	0.000426694
20	99524-14-8	C3H4O4	Malonic acid-1,3-13C2	18.1678	0.000249454
21	854851-58-4	C6H12O3	2-ethyl-3-hydroxy-butyric acid	17.8807	0.000245512
22	50-21-5	C3H6O3	Lactic acid	892.814	0.0122588	6008.52	0.0374625	2463.09	0.0215956
23	80-60-4	C4H9NO2	DL-2-aminobutyric acid	10.4588	0.000143605
24	685-73-4	C6H10O7	aldehydo-D-galacturonic acid	32.7817	0.000450109	30.0728	0.000187501
25	6064-63-7	C6H12O3	2-hydroxyhexanoic acid	4.3565	5.9817e-05
26	591-81-1	C4H8O3	4-hydroxybutyric acid	6.57309	9.02519e-05
27	503-66-2	C3H6O3	3-hydroxypropionic acid	71.0861	0.000976048			47.1968	0.000413807
28	473-81-4	C3H6O4	glyceric acid	16.9624	0.000232902	14.3204	8.9286e-05
29	3588-17-8	C6H6O4	trans,trans-muconic acid	22.223	0.000305133			51.635	0.000452719
30	34574-69-1	C12H22O5	3-hydroxydodecanedioic acid	4.23346	5.81275e-05
31	29625-75-0	C5H10O5	2,3,5-trihydroxypentanoic acid	24.2702	0.000333242			231.067	0.00202592
32	28127-66-4	C5H8O3	4-hydroxytiglic acid	219.505	0.00301392
33	18968-14-4	C710O7	D-(+)Glucuronic acid	5.79559	7.95765e-05	451.754	0.00281664
34	204388-60-3	C5H10O5	D-threo-2-deoxy-pentonic acid	6.88695	9.45613e-05	97.9032	0.000610417	39.4312	0.000345721
35	22329-72-2	C4H8O4	(2S)-2,4-dihydroxybutanoic acid	11.4129	0.000156704
36	1723-00-8	C6H11NO2	(R)-(+)-2-Piperidinecarboxylic acid	256.047	0.00351566	100.149	0.000624421	379.485	0.0033272
37	156-38-7	C8H8O3	4-hydroxyphenylacetic acid	15.3146	0.000210278
38	1518-61-2	C4H8O4	3,4-dihydroxybutyric acid	34.3474	0.000471607
39	13427-52-6	C6H10O7	xylo-3-deoxy-hexaric acid	79.8115	0.00109585			119.084	0.00104409
40	110-17-8	C4H4O4	fumaric acid	78.5722	0.00107884
41	110-15-6	C4H6O4	succinic acid	414.353	0.00568928			627.424	0.00550106
42	57-11-4	C17H36O2	stearic acid	1063.12	0.0145972	581.073	0.00362293
43	57-10-3	C16H32O2	Palmitic acid	1326.24	0.01821	647.751	0.00403866	913.367	0.00800812
44	121152-92-9	C6H10O5	3-(hydroxymethyl)pentanedioic acid					16.5558	0.000145156
45	490-79-9	C7H6O4	2,5-dihydroxybenzoic acid					29.2814	0.00025673
46	342385-52-8	C6H10O7	2-Keto-L-gulonic acid			3068.01	0.0191287
47	79-14-1	C2H403	Glycolic acid			28.5034	0.000177716	75.9707	0.000666087
48	498-36-2	C6H12O3	2-hydroxy-4-methylvaleric acid			12.0987	7.54345e-05
49	828-01-3	C9H10O3	3-phenyllactic acid			15.0511	9.3842e-05
50	63532-18-3	C5H10O5	4-Deoxy-pentonic acid					13.2092	0.000115814
51	73803-83-5	C6H10O7	2-keto-gulonic acid			93.6267	0.000583753	265.62	0.00232887
52	625-72-9	C4H8O3	(R)-3-hydroxybutyric acid			32.6818	0.000203768
53	70-49-5	C4H6O4S	thiomalic acid			11.7604	7.33246e-05
54	526-95-4	C6H12O7	D-gluconic acid			63.4265	0.000395458
sum				4666.29		11256.7		5321.08
Sugars
55	57-48-7	C6H12O6	D-fructofuranose	125.422	0.00172211	17017.7	0.106104	9249.77	0.0810991
56	5965-66-2	C12H22O11	β-lactose	154.4	0.00211999	128.555	0.000801525	414.1	0.0036307
57	6748-95-4	C5H10O5	β-D-arabinopyranose	1747.11	0.0239888	1435.81	0.00895215
58	6696-41-9	C6H12O5	α-L-fucose	33.0973	0.000454443
59	6155-36-8	C6H12O5	α,β-L-fucopyranose	21.8842	0.000300481
60	608-46-8	C5H10O5	α-D-lyxose	16.5986	0.000227907	274.098	0.00170897	74.2663	0.000651144
61	5978-95-0	C6H12O6	D-idose	177.718	0.00244016			264.777	0.00232148
62	87-72-9	C5H10O5	L-arabinopyranose	254.728	0.00349754	1410.05	0.00879149	404.146	0.00354343
63	58-86-6	C5H10O5	aldehydo-D-xylose	1050.62	0.0144256	884.748	0.00551632	850.438	0.00745638
64	93781-19-2	C5H10O5	D-Ribose	479.185	0.00657946	68.4043	0.000426494	69.9622	0.000613407
65	547-25-1	C12H22O11	turanose	166.856	0.00229102	233.128	0.00145353	237.588	0.0020831
66	28697-53-2	C5H10O5	D-(-)-Arabinose	206.899	0.00284083	46.6589	0.000290913	33.2456	0.000291487
67	26566-61-0	C6H12O6	α-D-galactose	97.0075	0.00133196	34.9181	0.000217711	363.298	0.00318528
68	2595-98-4	C6H12O6	aldehydo-D-talose	3145.67	0.0431917	315.759	0.00196873	3394.16	0.0297589
69	25545-03-3	C5H10O5	D-ribofuranose	224.27	0.00307934	83.9801	0.000523607	22.344	0.000195906
70	2280-44-6	C6H12O6	D-glucopyranose	22283.1	0.305958	24047.5	0.149934	16182.3	0.141881
71	19588-10-4	C5H10O5	D-Xylose	10.8565	0.000149065	1990.05	0.0124078	609.958	0.00534792
72	18546-37-7	C5H10O4	2-Deoxy-L-ribose	16.3632	0.000224675
73	1824-97-1	C6H12O5	methyl-β-D-ribonofurannoside	11.1061	0.000152493
74	1824-89-1	C7H14O6	methyl β-D-glucofuranoside	240.414	0.003301
75	16232-91-0	C9H18O8	(2R)-Glycerol-O-β-D-galactopyranoside	1411.36	0.0193787
76	13360-52-6	C12H22O11	β-D-Glucopyranose, 4-O-β-D-glucopyranosyl-	102.47	0.00140696	290.934	0.00181394
77	10257-31-5	C5H10O5	D-Xylopyranose	9.26938	0.000127273	1185.85	0.00739365	163.197	0.00143086
78	10323-20-3	C5H10O5	D(-)-Arabinose	954.844	0.0131105			15.1961	0.000133234
79	1824-94-8	C7H14O6	methyl β-D-galactoside			1114.39	0.00694813
80	10287-49-7	C7H14O6	6-O-Methyl-D-glucopyranose					1134.37	0.00994577
81	1361966-68-8	C6H12O5	6-deoxy-β-D-altrofuranose			15.2718	9.5218e-05
82	14215-77-1	C6H12O5	2-Deoxy-D-galactopyranose			43.1426	0.000268989
83	20074-49-1	C5H10O5	β-L-arabinofuranoside			26.8409	0.00016735	23.4356	0.000205476
84	35831-80-2	C6H12O6	α-L-sorbopyranose					9364.68	0.0821066
85	63-42-3	C12H22O11	lactose			480.703	0.00299714
86	6614-35-3	C12H22O11	D-melibiose			23354	0.14561	6037.25	0.0529327
87	69-79-4	C12H22O11	maltose			518.191	0.00323087	216.57	0.00189882
88	7512-17-6	C8H15NO6	N-acetyl-D-glucosamine			468.036	0.00291815	83.947	0.000736021
89	10257-28-0	C6H12O6	D-galactopyranose	1936.62	0.0265908	4808.95	0.0299833
91	1949-89-9	C6H12O5	2-deoxy-D-galactose			133.488	0.000832286
92	36468-82-3	C6H12O6	a-D-galactofuranose			1611.09	0.010045	737.042	0.00646216
93	5328-63-2	C6H12O5	Methyl β-D-arabinopyranoside					781.927	0.00685569
94	3615-41-6	C6H12O5	aldehydo-L-rhamnose			489.698	0.00305321	24.7762	0.00021723
95	57-50-1	C12H22O11	sucrose					109.049	0.000956105
96	84986-84-5	C12H22O11	O-β-D-glucopyranosyl-(1->3)-D-fructose			396.704	0.00247341
97	13117-26-5	C12H22O11	4-O-(α-D-Galactopyranosyl)-D-galactose			61.4942	0.00038341	594.135	0.00520919
98	14641-93-1	C12H22O11	Lactose			50.6951	0.000316079
99	10030-80-5	C6H12O6	aldehydo-L-mannose	1510.66	0.0207422
100	3615-37-0	C6H12O5	aldehydo-D-fucose			51.7201	0.000322469
101	609-06-3	C5H10O5	aldehydo-L-xylose			20.2349	0.000126162
102	7296-55-1	C5H10O5	alpha-L-Arabinopyranose			497.642	0.00310275
103	95-44-3	C4H8O4	L-threose			51.2542	0.000319564	43.6444	0.00038266
104	154-17-6	C6H12O5	2-Deoxy-D-glucose					192.991	0.00169208
129	7643-75-6	C5H12O5	L-arabinitol	284.483	0.0039061	10.5098	6.55274e-05	34729.7	0.3045
132	488-81-3	C5H12O5	D-ribitol	82.5114	0.00113292	13275.8	0.082773	39.0482	0.000342363
135	4271-28-7	C8H17NO6	N-acetyl-D-glucosaminitol	37.2612	0.000511615
137	69-65-8	C6H14O6	D-mannitol	3858.97	0.0529857			676.866	0.00593455
138	16277-71-7	C5H12O5	Xylitol					77.5506	0.00067994
sum
Esters
105	90-80-2	C6H10O6	Glucono-δ-Lactone	42.5949	0.00058485
106	89-67-8	C7H12O7	D-glycero-D-gulo-heptono-1,4-lactone	2016.87	0.0276926	54.6528	0.000340755	55.5513	0.000487056
107	78184-43-7	C6H10O6	L-allonic acid-4-lactone	38.9499	0.000534803			56.7195	0.000497299
108	542-44-9	C19H38O4	aldehydo-D-xylose	550.226	0.00755489	636.633	0.00396934	334.581	0.0029335
109	502488-11-1	C8H14O7	methyl (methyl-α-D-galactopyranosid)uronate	6712.19	0.0921618	589.597	0.00367608	165.084	0.0014474
110	3396-99-4	C7H14O6	methyl α-D-galactoside	241.676	0.00331834	733.776	0.00457502	93.0483	0.000815819
111	22430-23-5	C6H10O6	L-Mannono-1,4-lactone	8.34209	0.000114541	220.73	0.00137623	34.0643	0.000298665
112	15384-37-9	C5H8O5	D-xylono-1,4-lactone	59.4539	0.000816332	30.1463	0.000187959	82.5729	0.000723973
113	11099-07-3	C21H42O4	Glyceryl monostearate	3116.5	0.0427911
114	119008-23-0	C6H10O5	xylo-3-deoxy-hexonic acid-4-lactone	71.1217	0.000976538
115	119008-75-2	C6H10O6	D-galactono-1,4-lactone	68.643	0.000942504	6723.71	0.0419216	1624.27	0.0142411
116	123-94-4	C21H42O4	1-monostearoylglycerol			343.036	0.0021388	292.306	0.00256285
117	51532-86-6	C5H8O5	L-arabinono-1,4-lactone			10.6275	6.62612e-05	90.9274	0.000797223
118	112022-84-1	C13H18O5	(R)-4-(3,4-Dimethoxy-phenyl)-4-hydroxy-butyric acid methyl ester			16.5763	0.000103352
119	127997-10-8	C6H10O6	L-talonic acid γ-lactone			63.2548	0.000394387	20.563	0.00018029
120	6322-07-2	C6H10O6	D-gulonic acid-1,4-lactone			80.0322	0.000498993
121	133908-85-7	C5H8O5	L-ribono-1,4-lactone					31.2874	0.000274318
122	26301-79-1	C6H10O6	D-mannonic acid-4-lactone					5013.49	0.0439567
123	32746-79-5	C6H10O6	δ-D-mannononolactone					54.0336	0.00047375
124	5463-99-0	C8H14O7	methyl 3,4,5-trihydroxy-6-methoxyoxane-2-carboxylate					46.3973	0.000406797
125	7420-23-7	C9H18O8	O-β-D-Galactopyranosyl-(1->1)glycerin					222.469	0.00195053
Alcohols
126	98-85-1	C8H10O	1-phenylethanol	4.27982	5.87642e-05
127	87-89-8	C6H12O6	myo-inositol	1661.58	0.0228144	3903.89	0.0243403	5869.68	0.0514635
128	78-83-1	C4H10O	isobutanol	17.5526	0.000241006
130	57-55-6	C3H8O2	1,2-Propanediol	14.4908	0.000198966	32.5592	0.000203003	75.2717	0.000659959
131	513-85-9	C4H10O2	2,3-Butanediol	117.677	0.00161577	176.415	0.00109993	530.622	0.00465233
133	488-58-4	C6H12O6	epi-Inosito	413.9	0.00568306	2112.23	0.0131695
134	4435-50-1	C4H10O3	1,2,3-Butanetriol	304.688	0.00418352	240.028	0.00149655
136	13403-13-9	C8H16O6	2-(1,2-dihydroxyethyl)-5-ethoxyoxolane-3,4-diol	6257.47	0.0859182	88.8696	0.000554093
139	54917-62-3	C10H19NO6	2-(morpholin-4-ylmethyl)oxane-2,3,4,5-tetrol			71.6165	0.000446522
140	501-94-0	C8H10O2	2-(4-hydroxyphenyl)ethanol			45.9429	0.000286449
141	104870-74-8	C5H12O4	2-deoxy-L-threo-pentitol			26728.1	0.166647
142	608-81-1	C6H13NO6	Glucose oxime			6463.78	0.040301	2656.38	0.0232903
143	65173-64-0	C6H10O2	cyclohex-4-ene-1,2-diol			28.8467	0.000179856	22.9521	0.000201237
144	33947-09-0	C6H14O5	1-deoxy L-sorbitol					191.933	0.00168281
145	6917-35-7	C6H12O6	Cyclohexane-1,2,3,4,5,6-Hexol					54.0528	0.000473918
Ketones
146	1198-69-2	C6H10O6	D-Gluconic acid, γ-lactone	61.2032	0.000840352	88.8794	0.000554154	59.549	0.000522107
147	6936-66-9	C6H10O5	5-(1,2-dihydroxyethyl)-3-hydroxy-oxolan-2-one	26.4012	0.000362501
148	21730-93-8	C4H6O4	L-threonolactone	87.63	0.0012032	58.8214	0.000366745
149	23130-26-9	C15H14O4	davidigenin			20.0779	0.000125184
150	6328-86-5	C6H6O4	2-hydroxy-6-(hydroxymethyl)-4H-pyran-4-one			35.7568	0.00022294
151	42200-33-9	C17H27NO4	nadolol					91.1763	0.000799406
Others
152	57-13-6	CH4N2O	urea	103.837	0.00142574
153	58-96-8	C9H12N2O6	uridine	28.3592	0.000389386	49.9938	0.000311706	606.799	0.00532022
154	35652-37-0	C6H12O4	1,2,4,5-tetrahydroxycyclohexane	1009	0.0138541
155	2073-35-0	C6H10O7	L-idopyranuronic acid	108.039	0.00148343
156	6165-71-5	C4H4N2O2	2,4(1H,3H)-(5-3H)Pyrimidinedione	5.24813	7.20595e-05
157	299-42-3	C10H15NO	Benzenemethanol			15.9191	9.92543e-05	29.9995	0.000263026
158	1195525-07-5	C7H15NO6	D-galactose-(O-methyl oxime )			317.25	0.00197802
159	65144-74-3	C2H4O2	(Z)-Ethene-1,2-diol			10.7942	6.73009e-05
160	7558-19-2	C6H10O8	Mucin					111.093	0.000974029
90	10257-34-8	C5H10O5	(3S,4S,5R)-oxane-2,3,4,5-tetrol			26.581	0.00016573	17.2883	0.000151578
